# Supplementary material for: An AIE photosensitizer with unquenched fluorescence based on nitrobenzoic acid for tumor-targeting and image-guided photodynamic therapy
Source: Royal Society of Chemistry journal article supplement (doi:10.1039/d2bm00704e), 2022-01-01
Supplement: d2bm00704e1.pdf [file d2bm00704e1.pdf]

## Supporting Information

### An AIE photosensitizer with unquenched fluorescence based on nitrobenzoic acid for tumor-targeting and image-guided photodynamic therapy

Yaqi Wang<sup>1,2</sup>, Xiaohong Pan<sup>1\*</sup>, Tao Dai<sup>1,3</sup>, Le Wang<sup>1,3</sup>, Haixing Shi<sup>1,2</sup>, Huanhuan Wang<sup>1,3</sup>, Zhuo Chen<sup>1,3\*</sup>

<sup>1</sup>State Key Laboratory of Structural Chemistry, Fujian Institute of Research on the Structure of Matter, Chinese Academy of Sciences, Fujian Academy, University of Chinese Academy of Sciences, Fuzhou, Fujian 350002, China.

<sup>2</sup>Fujian Agriculture and Forestry University Fuzhou, Fujian 350002, China.

<sup>3</sup>University of Chinese Academy of Sciences, Beijing 100049, China.

\*Corresponding Authors

(E-mail: panxiaohong@fjirsm.ac.cn (X. Pan), zchen@fjirsm.ac.cn (Z. Chen))

### Content

1. **Synthesis and characterization**
2. **Fig. S1.** <sup>1</sup>H NMR and <sup>13</sup>C NMR spectra of **Biotin-TTVBA**.
3. **Fig. S2.** HRMS spectrum of **Biotin-TTVBA**.
4. **Fig. S3.** The measurements of fluorescence quantum yield.
5. **Fig. S4.** Fluorescence decay curves of **TTVBA** and **Biotin-TTVBA**.
6. **Fig. S5.** The measurements of the singlet oxygen quantum yield.
7. **Fig. S6.** Analysis of hydroxyl radicals generated in PBS under white light irradiation.
8. **Fig. S7.** Photoluminescence spectra of **Biotin-TTVBA** in different solvents.
9. **References**

**Synthesis of TTVBA:** A mixture of 5-(4-(diphenylamino)phenyl)thiophene-2-carbaldehyde<sup>1</sup> (355 mg, 1.0 mmol), methyl 2-methyl-5-nitrobenzoate (293 mg, 1.5 mmol) and K<sub>2</sub>CO<sub>3</sub> (414 mg, 3.0 mmol) in DMSO (10 mL) was stirred at 80 °C for 24 h and cooled to room temperature. Acetic acid aqueous solution (0.2 M, 40 mL) was added, and the resulting mixture was extracted with ethyl acetate. The extracts were combined, washed with H<sub>2</sub>O and brine, dried over Na<sub>2</sub>SO<sub>4</sub> and filtered. After removal of volatile components from the filtrate, the resulting crude product was purified by flash chromatography (silica, MeOH/CH<sub>2</sub>Cl<sub>2</sub> = 1/9) to give **TTVBA** (440 mg, 85%) as a red solid, the <sup>1</sup>H NMR data is consistent with the reported.<sup>2</sup>

**Synthesis of Biotin-TTVBA:** To a solution of **TTVBA** (100 mg, 0.19 mmol), *N*-(2-aminoethyl)-5-((3a*S*,4*S*,6a*R*)-2-oxohexahydro-1*H*-thieno[3,4-*d*]imidazol-4-yl)pentanamide (67 mg, 0.23 mmol) and HBTU (110 mg, 0.29 mmol) in DMF (8 mL) was added DIEA (75 mg, 0.58 mmol), and the mixture was stirred at room temperature for 30 min. Water (30 mL) was added, and the resulting mixture was extracted with ethyl acetate. The extracts were combined, washed with H<sub>2</sub>O and brine, dried over Na<sub>2</sub>SO<sub>4</sub> and filtered. After removal of volatile components from the filtrate, the resulting crude product was purified by flash chromatography (silica, MeOH/CH<sub>2</sub>Cl<sub>2</sub> = 1/9) to give **Biotin-TTVBA** (114 mg, 75%) as a red solid: <sup>1</sup>H NMR (400 MHz, DMSO-*d*<sub>6</sub>) δ 8.74 (t, *J* = 5.6 Hz, 1H), 8.27-8.25 (m, 2H), 8.12 (d, *J* = 8.8 Hz, 1H), 7.97 (t, *J* = 5.6 Hz, 1H), 7.75 (d, *J* = 16.0 Hz, 1H), 7.63 (d, *J* = 8.8 Hz, 2H), 7.42 (d, *J* = 3.6 Hz, 1H), 7.36-7.31 (m, 5H), 7.22 (d, *J* = 16.0 Hz, 1H), 7.12-7.06 (m, 6H), 6.98 (d, *J* = 8.8 Hz, 2H), 6.40 (s, 1H), 6.35 (s, 1H), 4.27-4.24 (m, 1H), 4.07-4.04 (m, 1H), 3.30-3.26 (m, 2H), 3.03-2.98 (m, 1H), 2.78 (dd, *J* = 12.4, 5.2 Hz, 1H), 2.56-2.53 (m, 2H), 2.09 (t, *J* = 7.6 Hz, 2H), 1.60-1.36 (m, 4H), 1.30-1.23 (m, 2H); <sup>13</sup>C NMR (100 MHz, DMSO-*d*<sub>6</sub>) δ 172.4, 166.8, 162.7, 147.3, 146.7, 145.2, 144.3, 141.3, 140.1, 136.3, 129.7, 128.0, 127.0, 126.6, 126.1, 124.5, 124.4, 123.7, 123.2, 122.6, 122.4, 61.0, 59.2, 55.4, 39.3, 38.2, 35.3, 28.2, 28.0, 25.2; HRMS (ESI) *m/e* calculated for C<sub>43</sub>H<sub>42</sub>N<sub>6</sub>O<sub>5</sub>S<sub>2</sub>Na (M+Na)<sup>+</sup> 809.2550, found 809.2527.

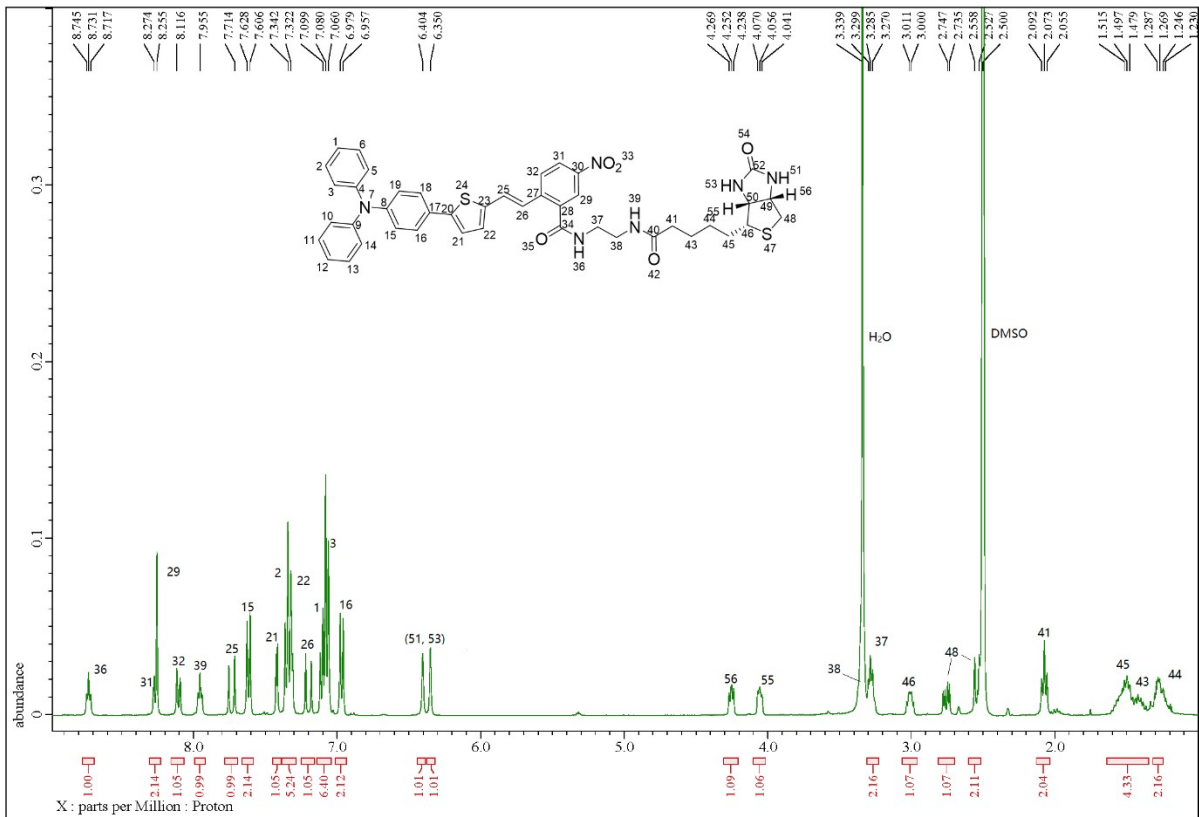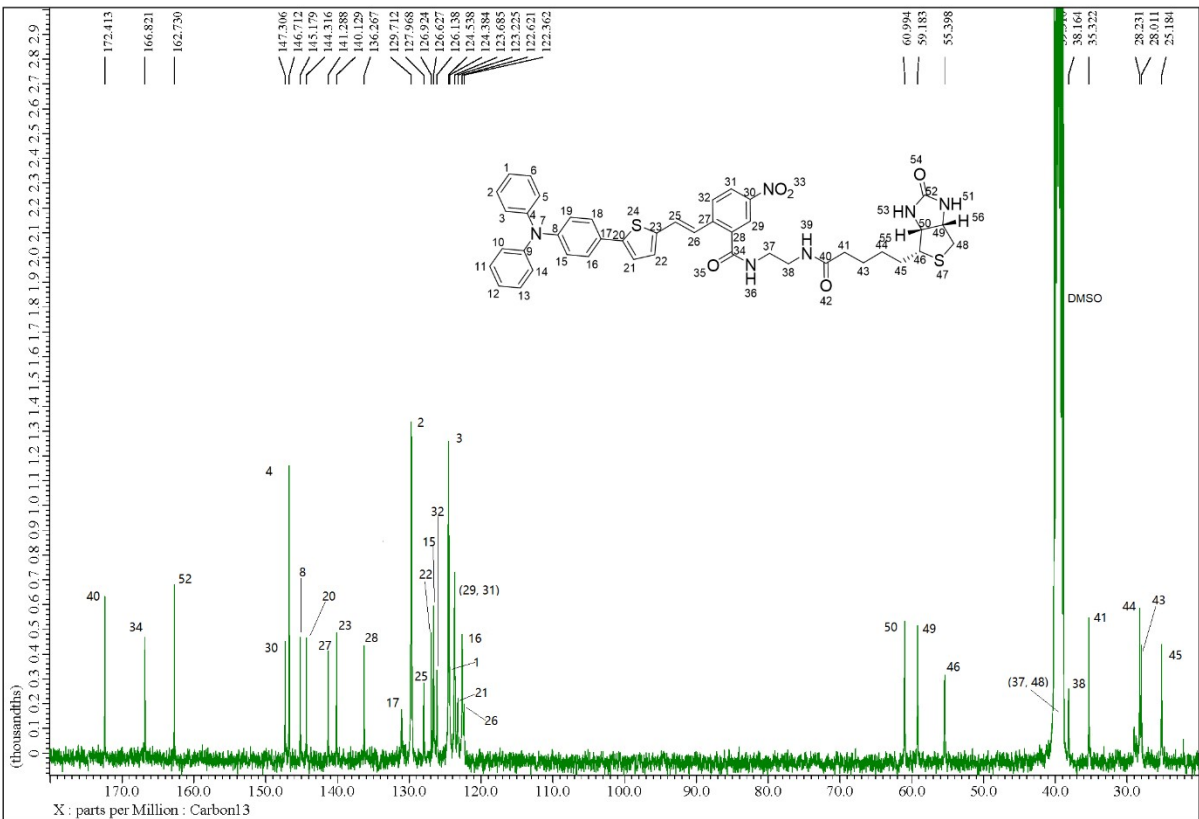

Fig. S1.  $^1\text{H}$  NMR and  $^{13}\text{C}$  NMR spectra of Biotin-TTVBA.

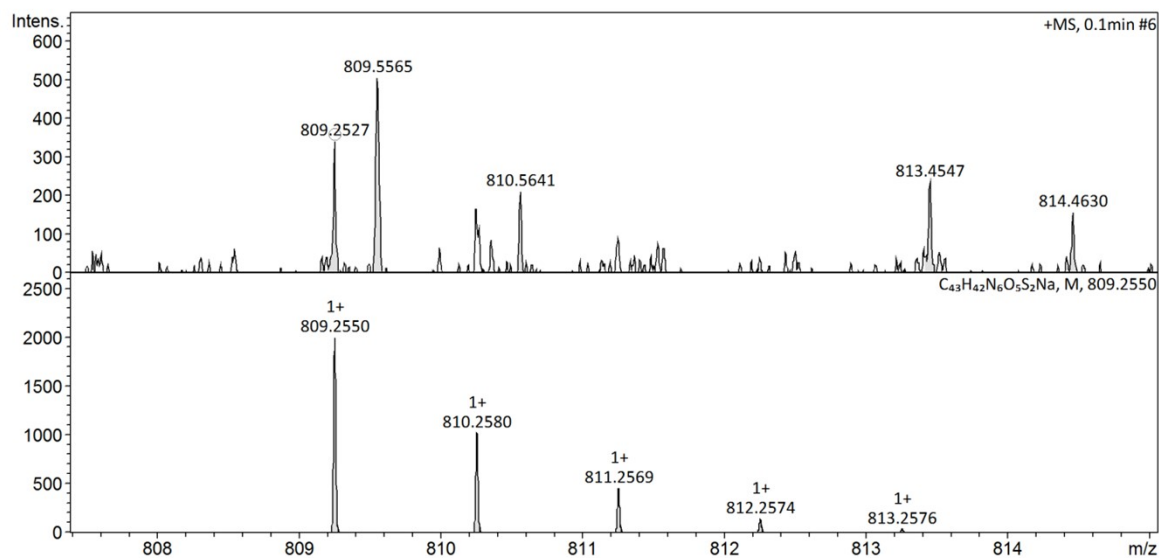

**Fig. S2.** HRMS spectrum of **Biotin-TTVBA**.

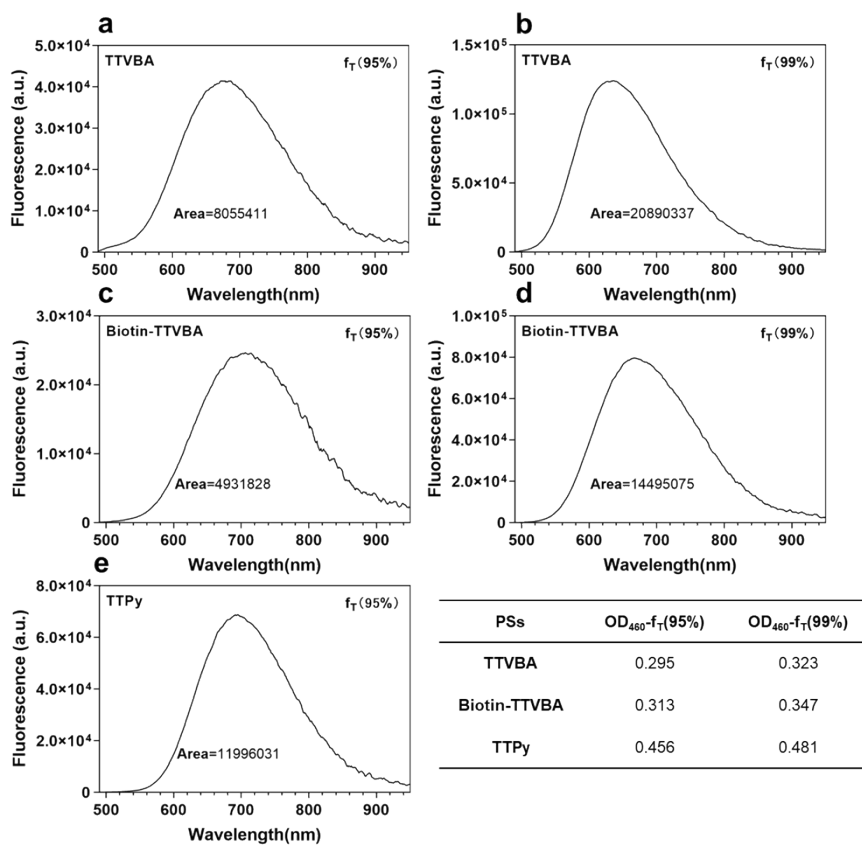

**Fig. S3.** The measurements of fluorescence quantum yield of (a) (b) **TTVBA** and (c) (d) **Biotin-TTVBA** (10  $\mu$ M) in DMSO with 95% or 99% toluene ( $\lambda_{\text{ex}} = 460$  nm), with (e) **TTPy** ( $\Phi = 0.089$ ) in DMSO with 95% toluene as a reference.

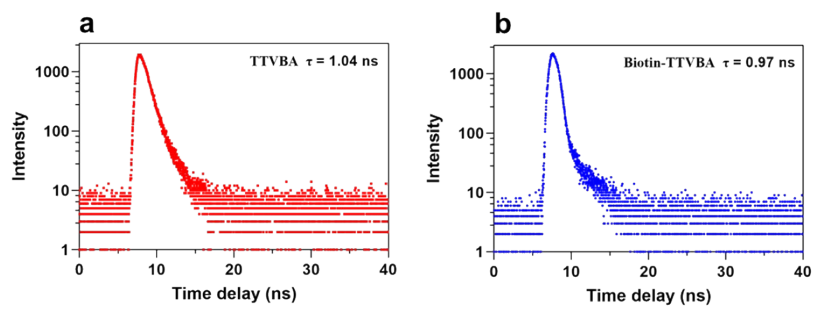

**Fig. S4.** Fluorescence decay curves of (a) TTVBA and (b) Biotin-TTVBA (10  $\mu$ M) in DMSO with 99% toluene.

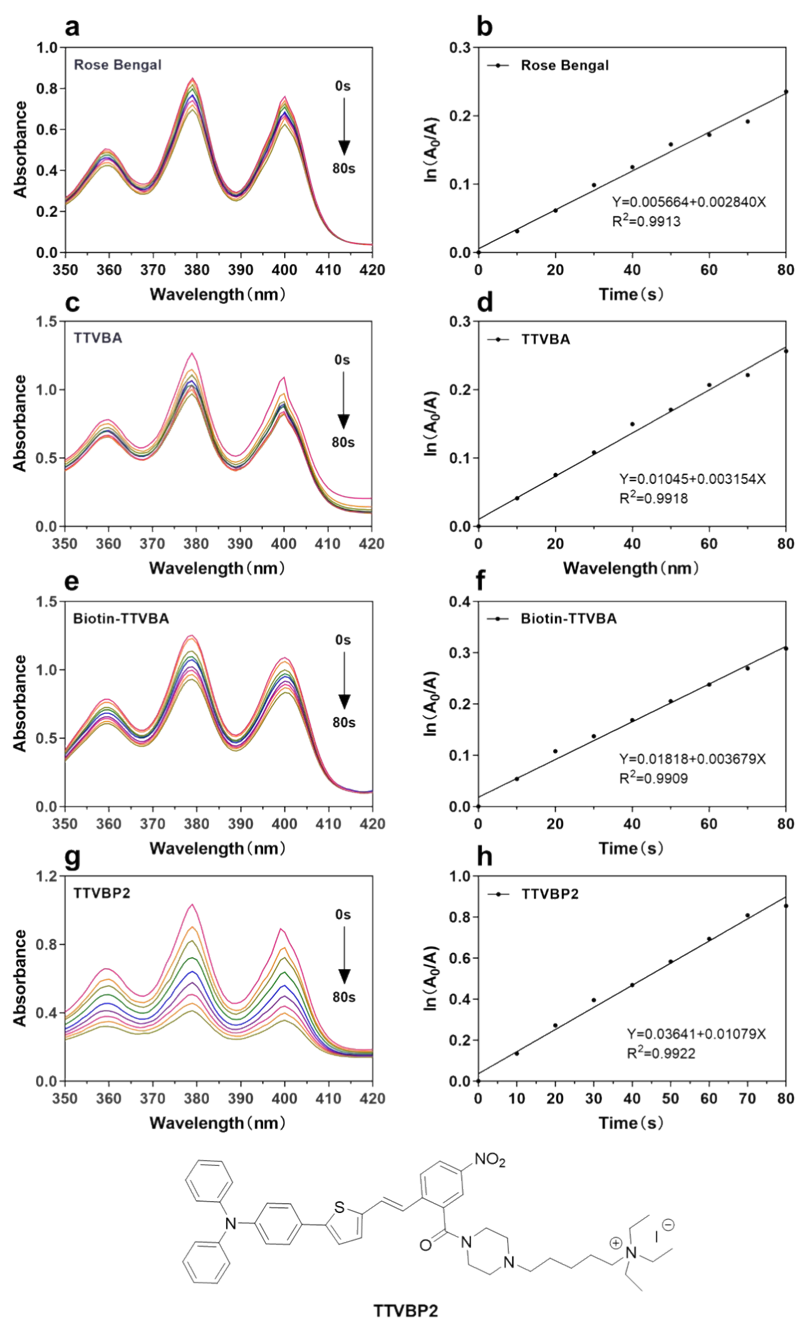

| PSs               | Rose Bengal | TTVBA  | Biotin-TTVBA | TTVBP2 |
|-------------------|-------------|--------|--------------|--------|
| OD <sub>415</sub> | 0.0227      | 0.1320 | 0.1429       | 0.1841 |

**Fig. S5.** The measurements of the singlet oxygen quantum yield. Photodegradation of ABDA with (a) Rose Bengal, (c) TTVBA, (e) **Biotin-TTVBA** and (g) **TTVBP2** under blue light irradiation ( $415 \pm 5$  nm,  $20 \text{ mW/cm}^2$ ). The decomposition rate constants of ABDA by (b) Rose Bengal, (d) **TTVBA**, (f) **Biotin-TTVBA** and (h) **TTVBP2**.

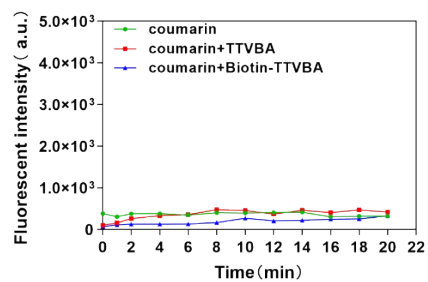

**Fig. S6.** Analysis of hydroxyl radicals generated by **TTVBA** or **Biotin-TTVBA** in PBS under white light (400 – 700 nm, 20 mW/cm<sup>2</sup>) irradiation using coumarin ( $\lambda_{\text{ex}} = 360$  nm,  $\lambda_{\text{em}} = 450$  nm) as a specific probe.

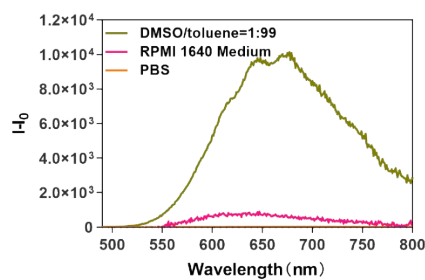

**Fig. S7.** Photoluminescence spectra of **Biotin-TTVBA** (10  $\mu\text{M}$ ) in different solvents ( $\lambda_{\text{ex}} = 458$  nm).

## References

1. D. P. Hagberg, X. Jiang, E. Gabrielsson, et al., *Journal of Materials Chemistry*, 2009, **19**, 7232-7238.
2. H. Wang, X. Pan, Y. Wang, et al., *Science China Materials*, 2021, **64**, 2601-2612.
